# Supplementary material for: IL7Rα, but not Flk2, is required for hematopoietic stem cell reconstitution of tissue-resident lymphoid cells
Source: PubMed Central journal article supplement (PMC8917444; doi:10.1242/dev.200139), 2022-01-24
Supplement: develop-149-200139-s1.pdf [file develop-149-200139-s1.pdf]

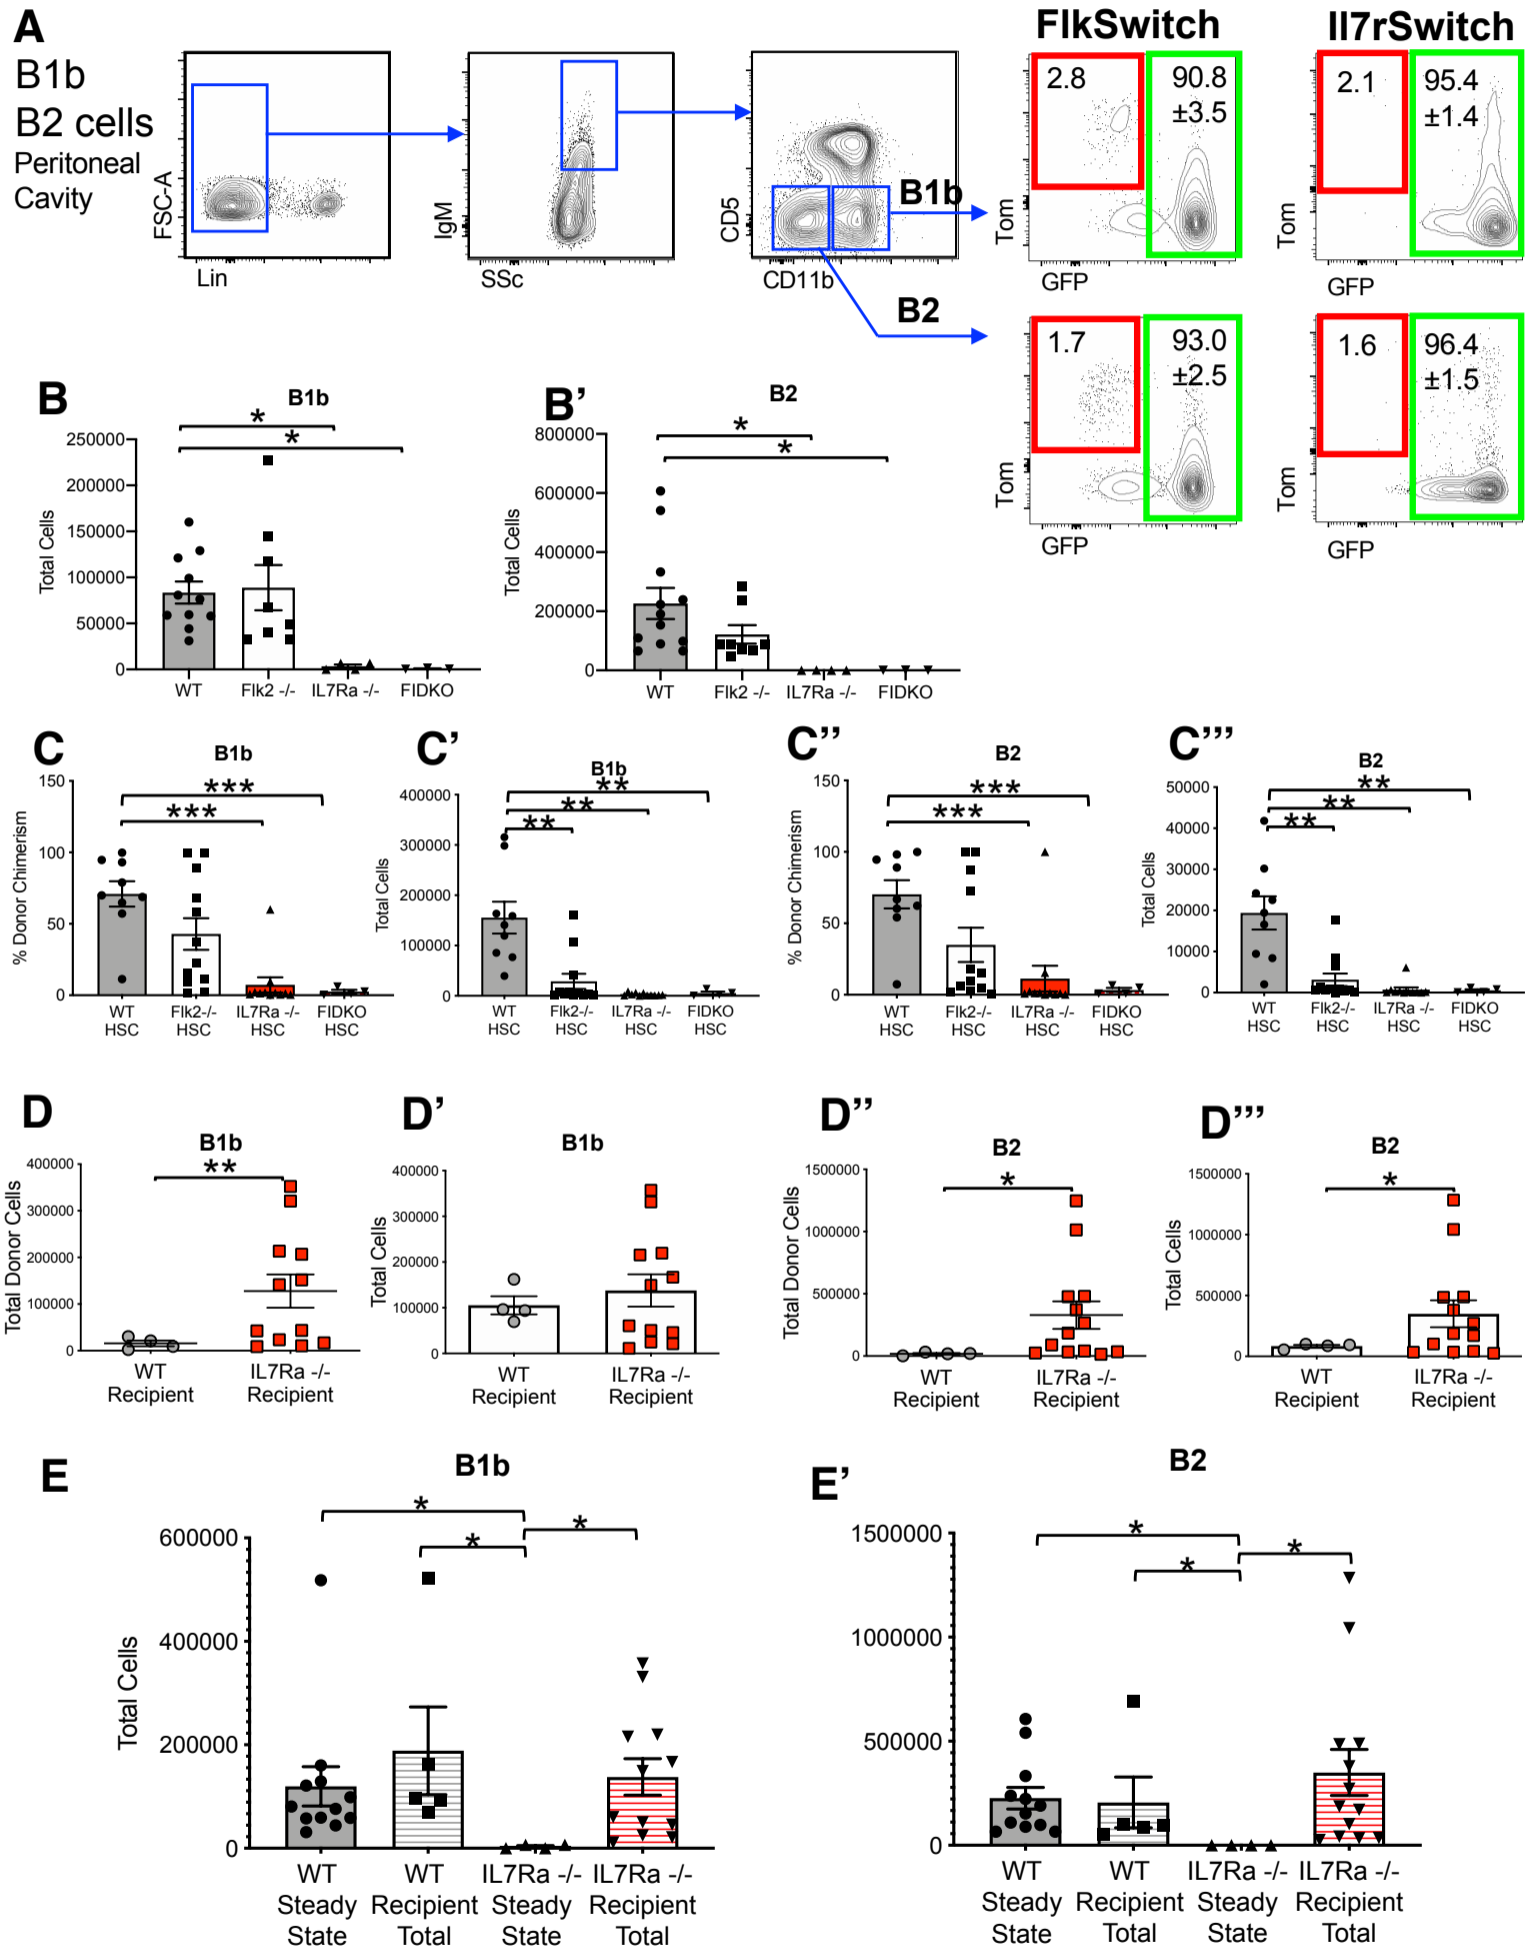

**Fig. S1. B1b and B2 cells from the peritoneal cavity behave like traditional, circulating B-cells.**

**A)** B1b (Lin<sup>-</sup>IgM<sup>+</sup>CD5<sup>-</sup>CD11b<sup>mid</sup>) and B2 (Lin<sup>-</sup>IgM<sup>+</sup>CD5<sup>-</sup>CD11b<sup>-</sup>) cells from the peritoneal cavity were highly labeled in both FlkSwitch and IL7rSwitch lineage tracing models. Representative flow cytometric analysis of reporter expression.

**B)** B1b and **B')** B2 cells were significantly reduced in IL7R $\alpha^{-/-}$  and FIDKO mice compared to WT. Quantification of total cell numbers in the peritoneal cavity. Data are representative of 4-5 mice per cohort in three independent experiments.

**C, C'')** Donor Chimerism of B1b and B2 cells was significantly reduced from IL7R $\alpha^{-/-}$  (red bars) and FIDKO (red square bars) donor HSCs compared to WT (grey bars) donor HSCs. Quantification of donor chimerism of B1b and B2 cells respectively.

**C', C''')** Cellularity of B1b and B2 cells was significantly reduced from Flk2 $^{-/-}$  (white bars), IL7R $\alpha^{-/-}$  (red bars) and FIDKO (red square bars) donor HSCs compared to WT (grey bars) donor HSCs. Quantification of total B1b and B2 cells. WT n=9, Flk2 $^{-/-}$  n=11, IL7R $\alpha^{-/-}$  n=7, FIDKO n=4, representing a minimum of four independent experiments. **D, D'')** Significantly greater donor-derived B1b and B2 cells in an IL7R $\alpha^{-/-}$  recipient (red squares) compared to a WT recipient (grey dots). Quantification of donor-derived cells of B1b and B2 cells, respectively.

**D', D''')** Significantly greater total B2 cells in an IL7R $\alpha^{-/-}$  recipient (red squared) compared to a WT recipient (grey dots). Quantification of total cells (donor+host) of B1b and B2, respectively. WT recipient n=5, IL7R $\alpha^{-/-}$  recipient n=13, representing four independent experiments.

**E-E')** Bar graph comparing circulating B cells and TLCs cells at steady state (solid bars) to their reconstitution upon transplantation of WT HSCs (pattern bars). Cellularity of B1b and B2 in WT or IL7R $\alpha^{-/-}$  mice are compared to WT and IL7R $\alpha^{-/-}$  mice reconstituted with WT HSCs.

Differences in B-D) were analyzed with two-tailed Student t test; \*, P<0.05; \*\*, P< 0.005; \*\*\*, P<0.0005. Differences in E-E') were analyzed with one-way ANOVA; B1b p=0.0107 and B2 p=0.0129 and Dunnett multi-parameter test; \*, P<0.05; \*\*, P< 0.005; \*\*\*, P<0.0005.

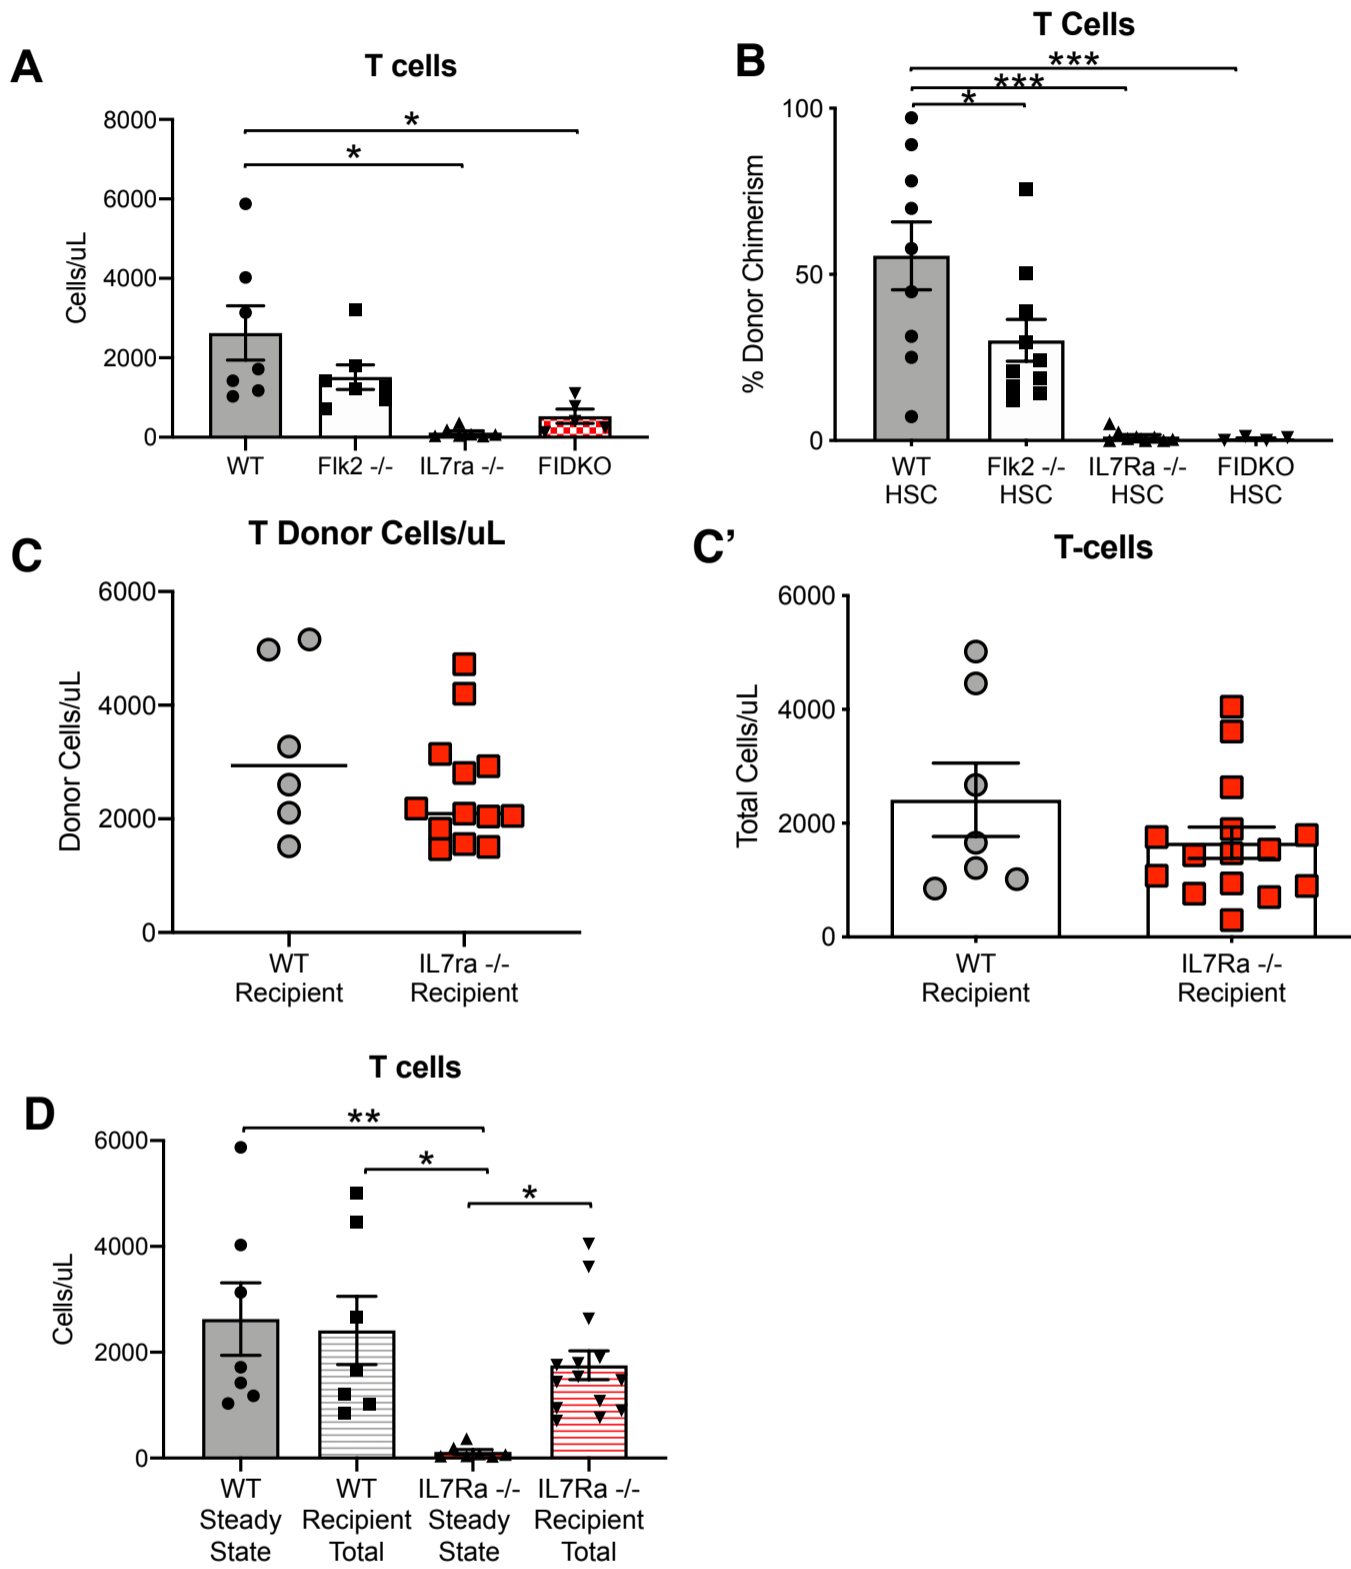

**Fig. S2. CD3<sup>+</sup> T cells in peripheral blood require IL7R $\alpha$ .**

**A)** Numbers of “traditional” CD3<sup>+</sup> T cells in the peripheral blood of 8 to 12 week old WT, Flk2<sup>-/-</sup>, IL7R $\alpha$ <sup>-/-</sup> and FIDKO mice. WT (grey), Flk2<sup>-/-</sup> (white), IL7R $\alpha$ <sup>-/-</sup> (red) and Flk2<sup>-/-</sup>/IL7R $\alpha$ <sup>-/-</sup> double knockout (FIDKO; red/white). Data from the same mice as in Figure 2.

**B)** 500 WT, Flk2<sup>-/-</sup>, IL7R $\alpha$ <sup>-/-</sup> or FIDKO HSCs were transplanted into sublethally irradiated fluorescent WT recipients (mTmG or UBC-GFP) and donor chimerism of peripheral blood CD3<sup>+</sup> T cells was quantified 16 weeks post transplantation. Reconstitution of T cells was significantly impaired upon transplantation of IL7R $\alpha$ <sup>-/-</sup> (red bars) and FIDKO HSCs (red/white bars) compared to WT HSCs (grey bars). Data from the same mice as in Figure 3.

**C-C’).** 500 fluorescent WT HSCs (UBC-GFP), were transplanted into sublethally irradiated non-fluorescent WT or IL7R $\alpha$ <sup>-/-</sup> recipients. Donor contribution to peripheral blood CD3<sup>+</sup> T cells was quantified 16 weeks post-transplantation. **C)** Donor-derived and **C’)** total T cells were not changed in an IL7R $\alpha$ <sup>-/-</sup> recipient compared to a WT recipient. Data from the same mice as Figure 4.

**D)** Cellularity of peripheral blood CD3<sup>+</sup> T cells in WT or IL7R $\alpha$ <sup>-/-</sup> mice (solid bars) are compared to WT and IL7R $\alpha$ <sup>-/-</sup> mice reconstituted with WT HSCs (pattern bars).

Differences in A-C’) were analyzed with two-tailed Student t-test relative to WT mice, and differences in D) were analyzed across all four conditions by one-way ANOVA ( $p=0.0037$ ) and Dunnett multi-parameter test. \*,  $P<0.05$ ; \*\*,  $P< 0.005$ ; \*\*\*,  $P< 0.0005$ ; \*\*\*\*,  $P< 0.00005$ .

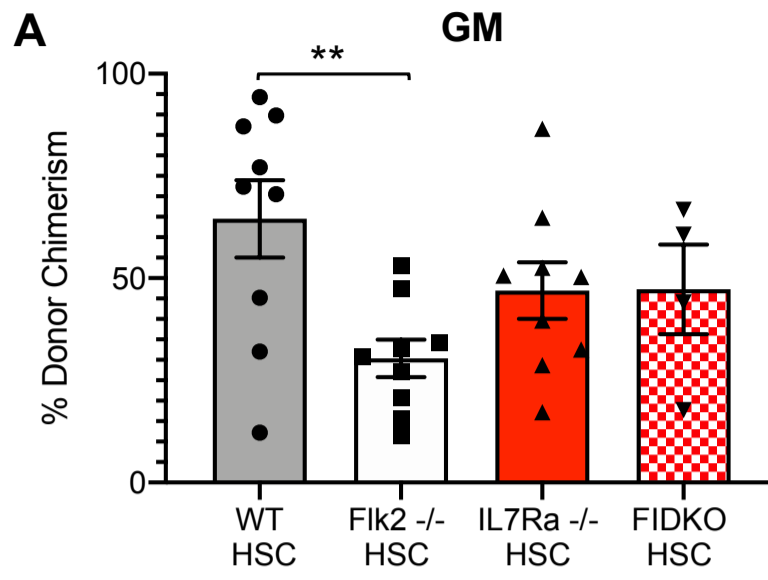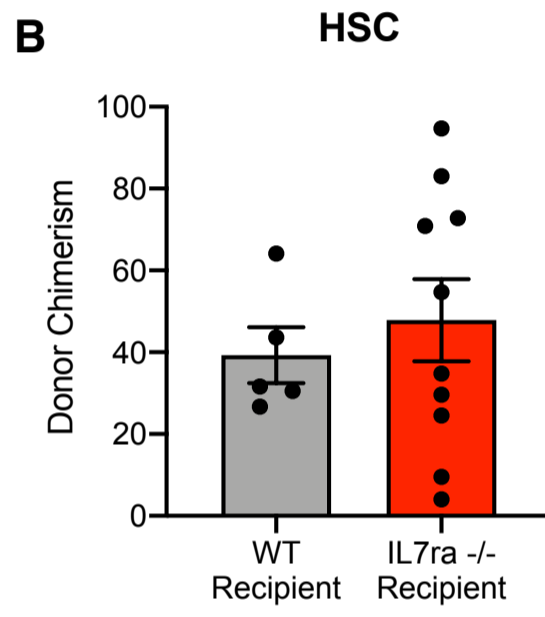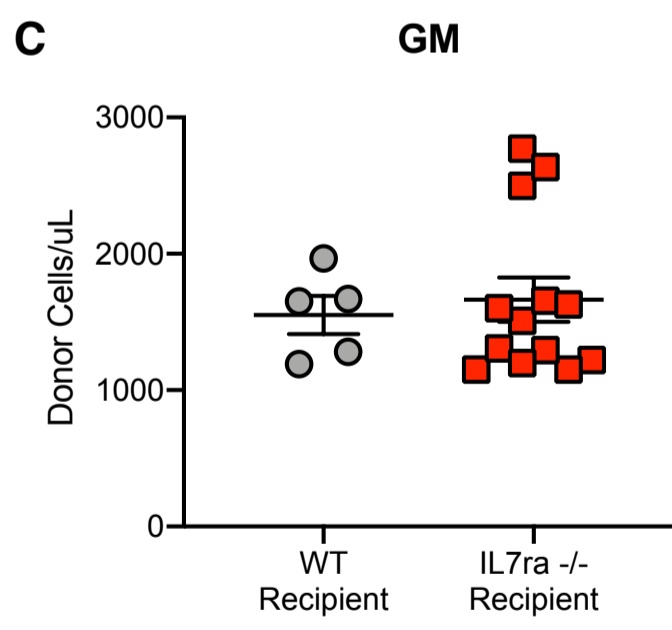

**Fig. S3. HSC engraftment was robust, regardless of donor HSC or recipient genotype.**

**A)** 500 WT, Flk2<sup>-/-</sup>, IL7Rα<sup>-/-</sup> or FIDKO HSCs were transplanted into sublethally irradiated fluorescent WT recipients (mTmG or UBC-GFP) and donor chimerism of peripheral blood Granulocyte/Macrophages (GMs) cells was quantified 16 weeks post transplantation. Reconstitution of GMs was not significantly impaired upon transplantation of Flk2<sup>-/-</sup> (white bars), IL7Rα<sup>-/-</sup> (red bars), or FIDKO HSCs (red/white bars) compared to WT HSCs (grey bars). Data from the same mice as in Figure 3.

**B,C).** 500 fluorescent WT HSCs (UBC-GFP), were transplanted into sublethally irradiated non-fluorescent WT or IL7Rα<sup>-/-</sup> recipients. Donor contribution to peripheral blood GMs and bone marrow HSCs was quantified 16 weeks post-transplantation. Data from the same mice as in Figure 4. **B)** Donor chimerism of bone marrow HSCs was similar in IL7Rα<sup>-/-</sup> compared to WT recipients. **C)** Donor-derived GM cells/uL of blood was similar in IL7Rα<sup>-/-</sup> compared to WT recipients. Statistics by two-tailed Student t-test. \*\*, P < 0.005.

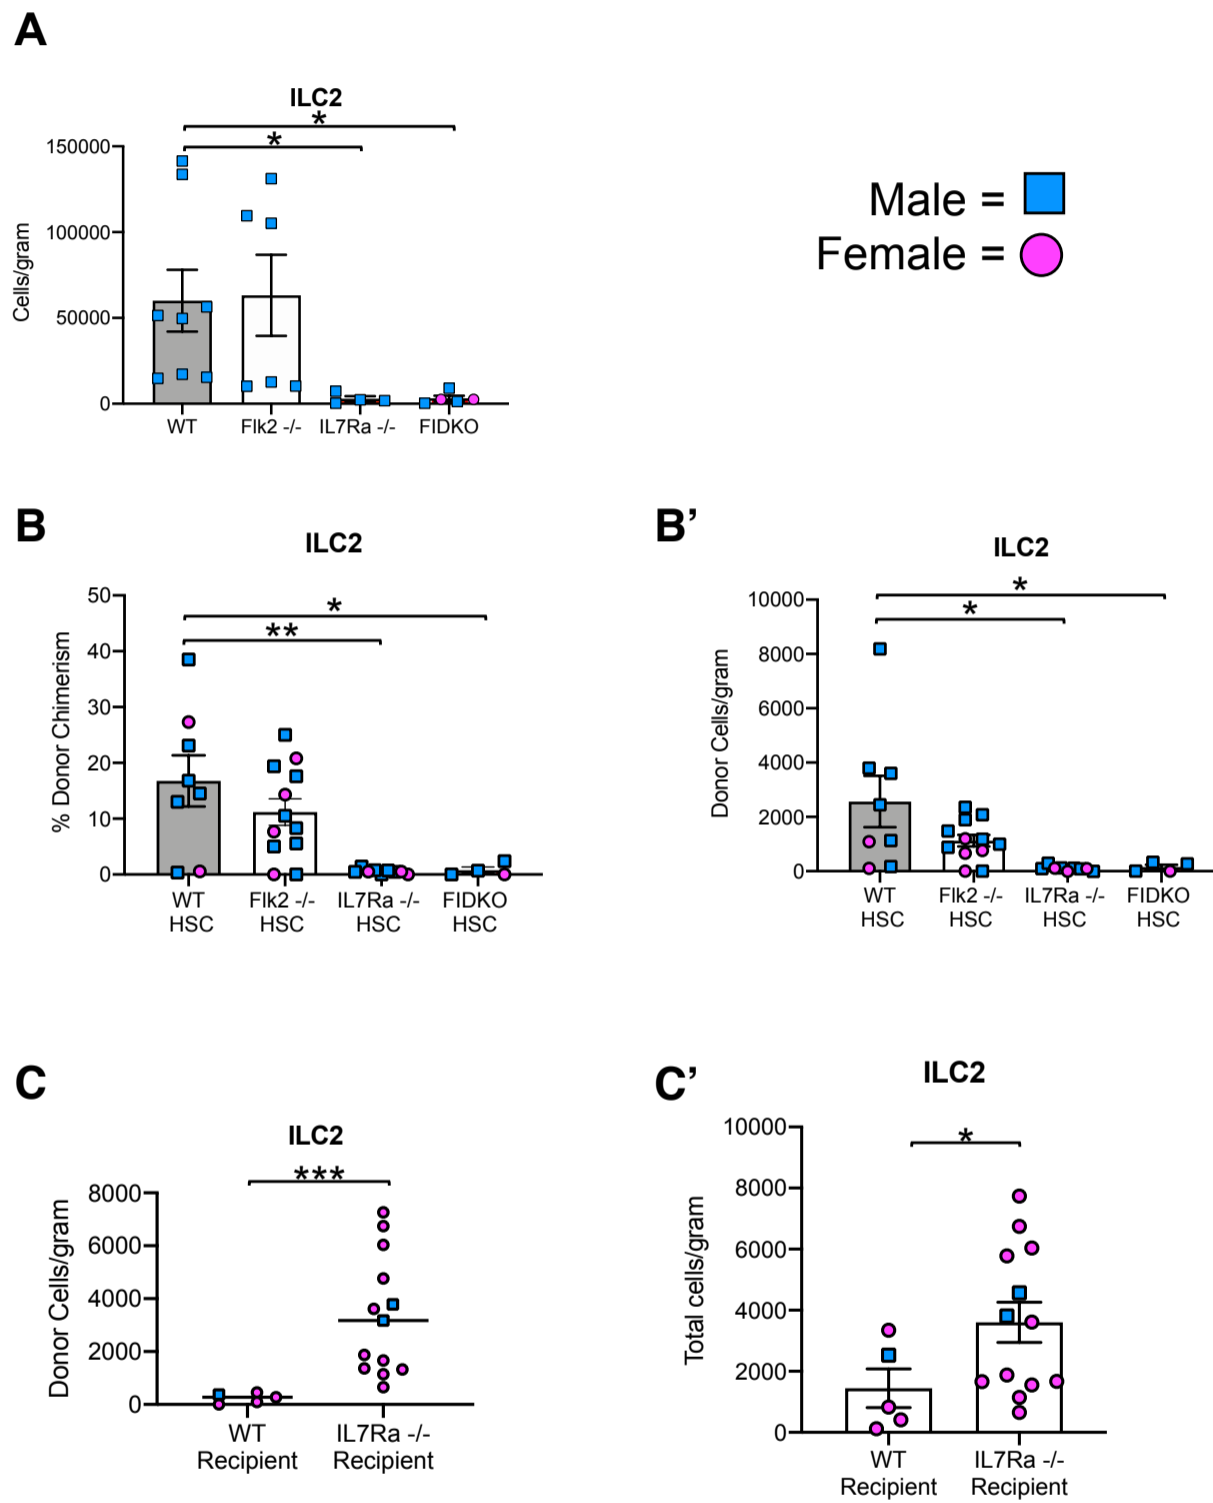

**Fig. S4. ILC2s in the lung were similarly affected in male and female mice.**

Data from figures 2, 3 and 4, with sex designation of each datapoint. Blue squares denote male mice and pink circles denote female mice.

**A)** Quantification of ILC2s in WT, Fik2<sup>-/-</sup>, IL7Ra<sup>-/-</sup>, and FIDKO mice. Data from Figure 2.

**B)** Donor Chimerism and

**B')** quantification of donor ILC2s in from WT HSC, Fik2<sup>-/-</sup> HSC, IL7Ra<sup>-/-</sup> HSC, and FIDKO HSC mice. Data from Figure 3.

**C)** Quantification of donor-derived ILC2s and

**C')** quantification of total (host+donor) ILC2 numbers in WT and IL7Ra<sup>-/-</sup> recipients. Data from Figure 4.

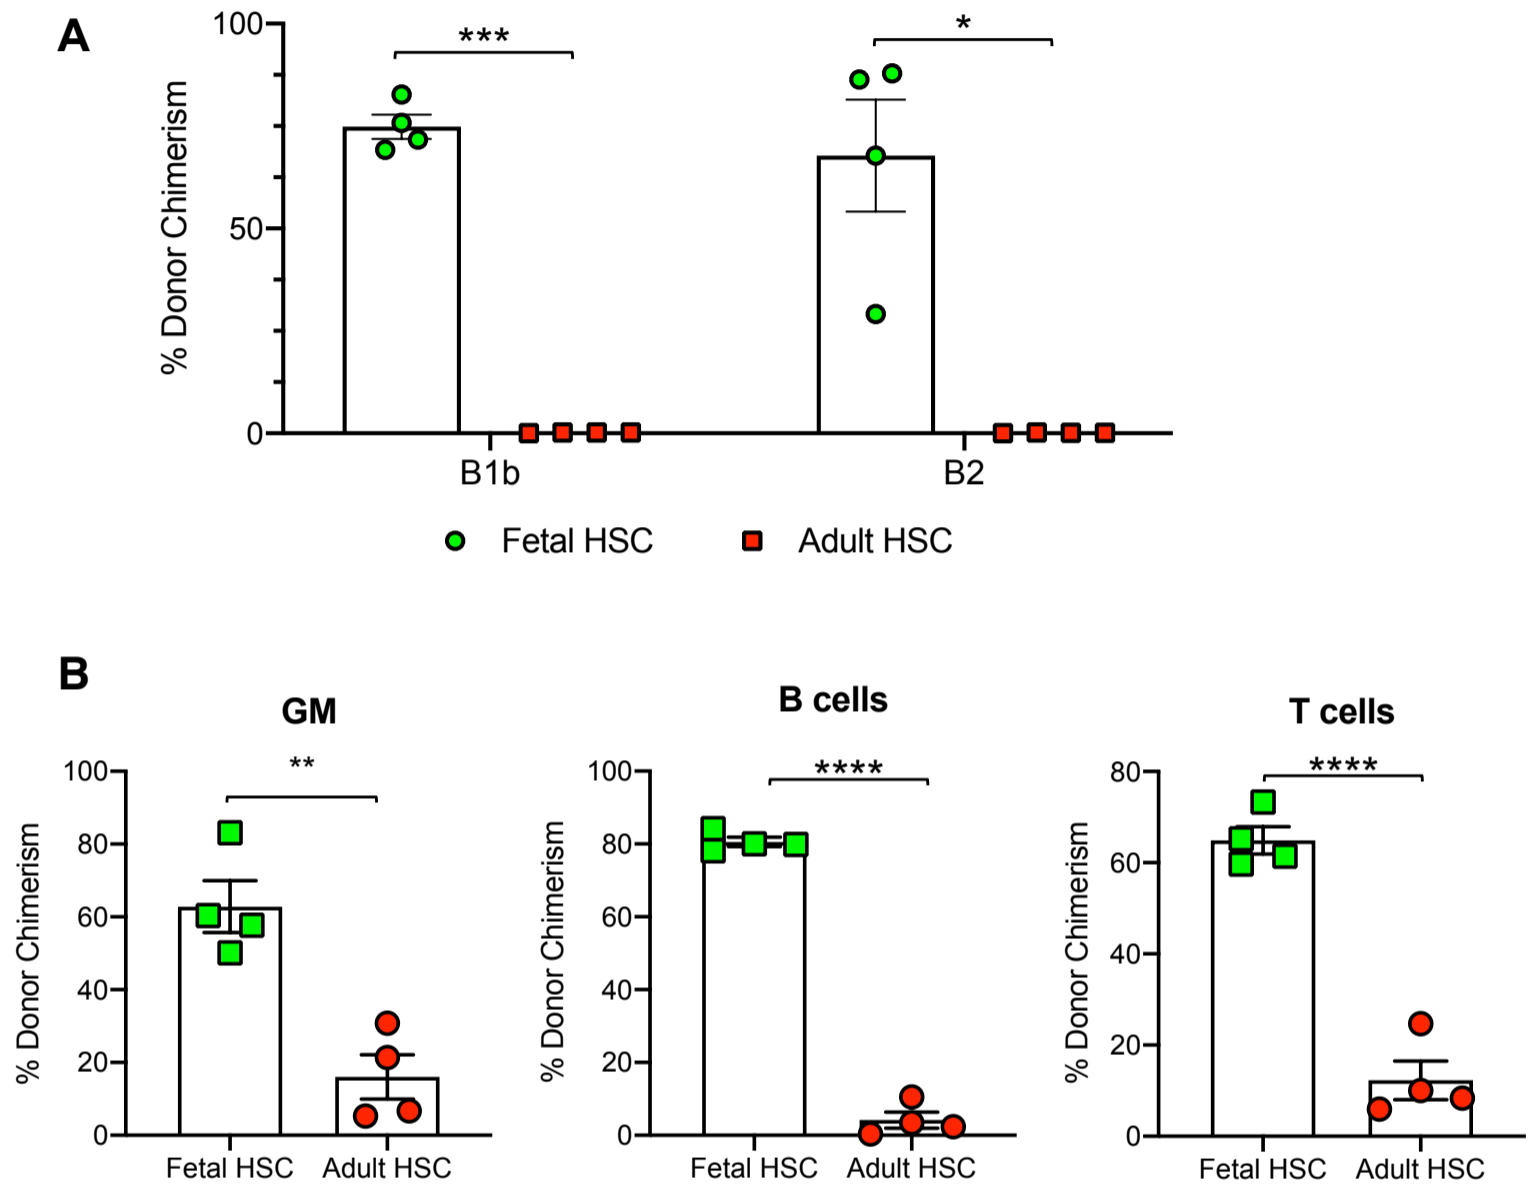

**Fig. S5. Fetal HSCs had greater mature cell reconstitution capacity compared to adult HSCs.** 250 fetal HSCs and 250 adult HSCs from different fluorescent mice (KuO and UBC- GFP, respectively) were co-transplanted into sublethally irradiated WT recipients and donor contribution to mature cells was quantified >16 weeks post transplantation.

**A)** Donor chimerism of peritoneal B1b and B2 was significantly greater by fetal HSCs compared to adult HSCs.

**B)** Donor chimerism of peripheral blood GMs, B cells and T cells was significantly greater by fetal HSCs compared to adult HSCs. Data from the same mice as in Figure 6. Differences were analyzed with two-tailed Student t test \*,  $P < 0.05$ ; \*\*,  $P < 0.005$ ; \*\*\*,  $P < 0.0005$ .



**Table S1. Antibodies used in experiments**

| Antibody         | Source       | Identifier | Dilution |
|------------------|--------------|------------|----------|
| B220 - APC Cy7   | Biolegend    | 103224     | 1:400    |
| CD3- APC         | Biolegend    | 100236     | 1:200    |
| CD4 - BV605      | Biolegend    | 100451     | 1:400    |
| CD5 - APC        | Biolegend    | 100625     | 1:200    |
| CD11b - PB       | Biolegend    | 101223     | 1:400    |
| CD11b- PECy7     | Biolegend    | 101216     | 1:400    |
| CD21 - PE Cy7    | Ebiosciences | 25-0211-82 | 1:200    |
| CD23 - PB        | Biolegend    | 101616     | 1:200    |
| CD25 - APC Cy7   | Biolegend    | 102026     | 1:200    |
| CD45.2 - PB      | Biolegend    | 109820     | 1:400    |
| CD61-Alexa 647   | Biolegend    | 104314     | 1:400    |
| CD150 - BV786    | Biolegend    | 115937     | 1:400    |
| cKit - APC Cy7   | Biolegend    | 105826     | 1:800    |
| Flk2 - APC       | Biolegend    | 135310     | 1:100    |
| FoxP3 - PB       | Biolegend    | 126409     | 1:100    |
| Gr1-Pacific Blue | Biolegend    | 108430     | 1:400    |
| IgM - BV605      | Biolegend    | 406523     | 1:400    |
| KLRG - BV605     | Biolegend    | 138419     | 1:100    |
| Sca1 - PB        | Biolegend    | 122520     | 1:400    |
| TCRB - Pe Cy7    | Biolegend    | 109222     | 1:200    |
| Ter119-PECy5     | Biolegend    | 116210     | 1:800    |

| Antibody        | Source      | Identifier  | Dilution |
|-----------------|-------------|-------------|----------|
| CD3 - A700      | Biolegend   | 100216      | 1:100    |
| CD4 - A700      | Biolegend   | 100429      | 1:400    |
| CD5 - A700      | R&D Systems | FAB115N-025 | 1:400    |
| CD8 - A700      | Biolegend   | 300919      | 1:200    |
| Ter119 - A700   | Biolegend   | 116220      | 1:400    |
| B220 - A700     | Biolegend   | 103231      | 1:400    |
| Gr1 - A700      | Biolegend   | 108421      | 1:400    |
| CD11b - A700    | Biolegend   | 101222      | 1:800    |
| CD3 - biotin    | Biolegend   | 100243      | 1:200    |
| CD4 - biotin    | Biolegend   | 100403      | 1:200    |
| CD5 - biotin    | Biolegend   | 100603      | 1:400    |
| CD8 - biotin    | Biolegend   | 100703      | 1:200    |
| Ter119 - biotin | Biolegend   | 116203      | 1:400    |
| Nk1.1 - biotin  | Biolegend   | 108703      | 1:200    |
| CD19 - biotin   | Biolegend   | 115503      | 1:400    |
| F4/80 - biotin  | Biolegend   | 123105      | 1:400    |
| FcεRIα - biotin | Biolegend   | 101303      | 1:200    |
| STA - BV786     | Biolegend   | 405249      | 1:400    |
